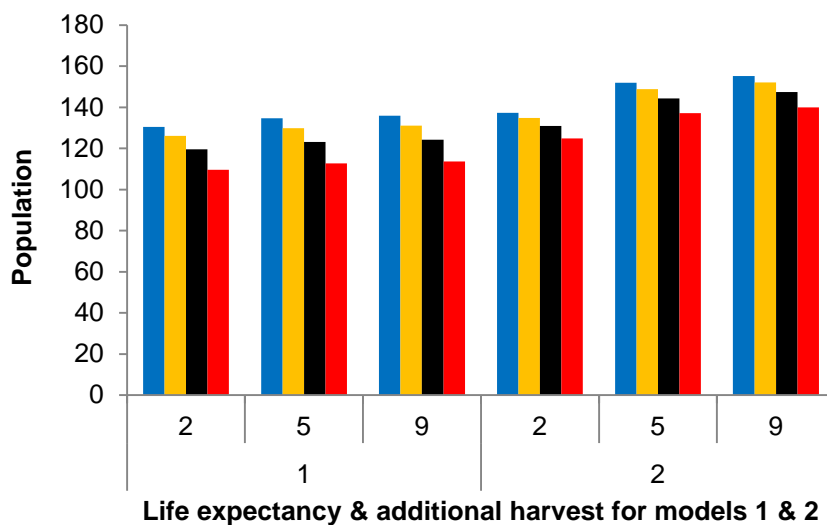

**S5 Figure. Population size following Newcastle disease (ND) introduction.** Population size at two years post ND introduction for homogeneous (model 1) and age-structure (model 2) populations of white-winged parakeets with no additional harvest ( $hI=0$  blue) and three additional uncompensated harvest rates ( $hI=2\%$  orange,  $hI=5\%$  black, and  $hI=10\%$  red) and for three life expectancies ( $D_d =$  two, five, and nine years).
