# Supplementary material for: Interacting Effects of Newcastle Disease Transmission and Illegal Trade on a Wild Population of White-Winged Parakeets in Peru: A Modeling Approach
Source: PLOS journal article supplement (doi:10.1371/journal.pone.0147517), 2016-01-27
Supplement: S2 (10.1371/journal.pone.0147517.s002) [file journal.pone.0147517.s002]

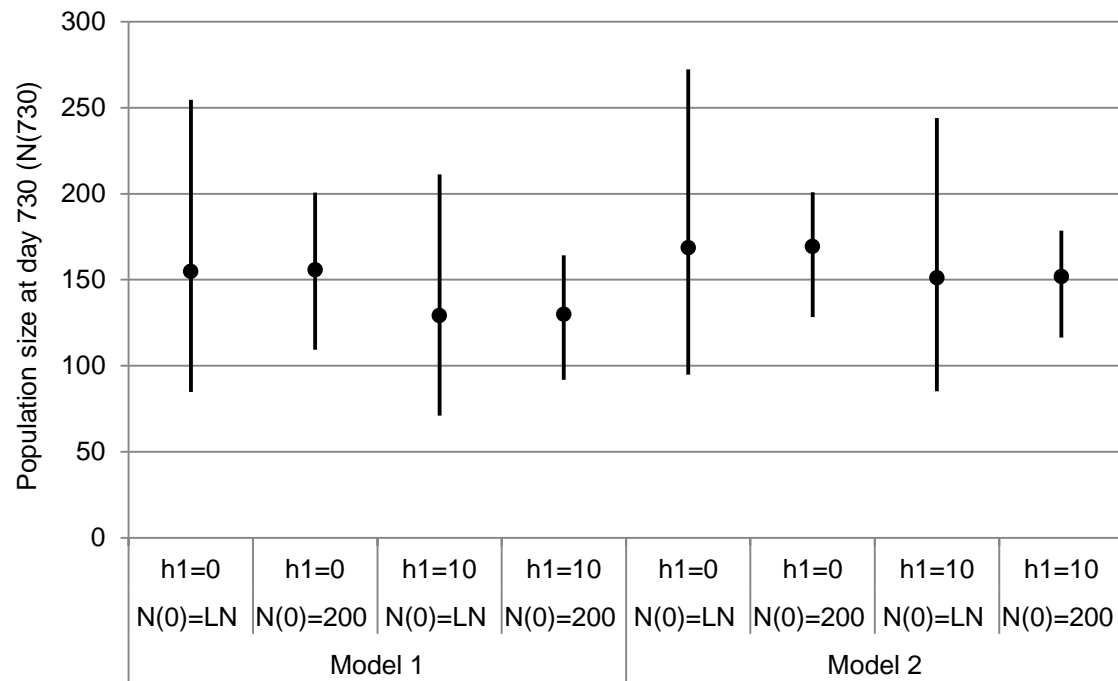

**S2 Figure. Comparison of the effect of a fixed and uncertain initial population size on the predicted population size at two years post-introduction of Newcastle disease into a homogeneous (model 1) and age-structured (model 2) population of white-winged parakeets.** Black dots show the mean predicted population size while the bars indicate the associated confidence intervals (based on 5th and 95th percentiles). The initial population size was either fixed ( $N(0)=200$ ) or uncertain ( $N(0)=LN$  where  $LN=\text{Lognormal}(189, 1.4)$ ), while additional harvest was either ( $h1=0$ ) or 10% ( $h1=10$ ). For each scenario, results were based on 10,000 simulations.
