# Supplementary material for: Interacting Effects of Newcastle Disease Transmission and Illegal Trade on a Wild Population of White-Winged Parakeets in Peru: A Modeling Approach
Source: PLOS journal article supplement (doi:10.1371/journal.pone.0147517), 2016-01-27
Supplement: S4 (10.1371/journal.pone.0147517.s004) [file journal.pone.0147517.s004]

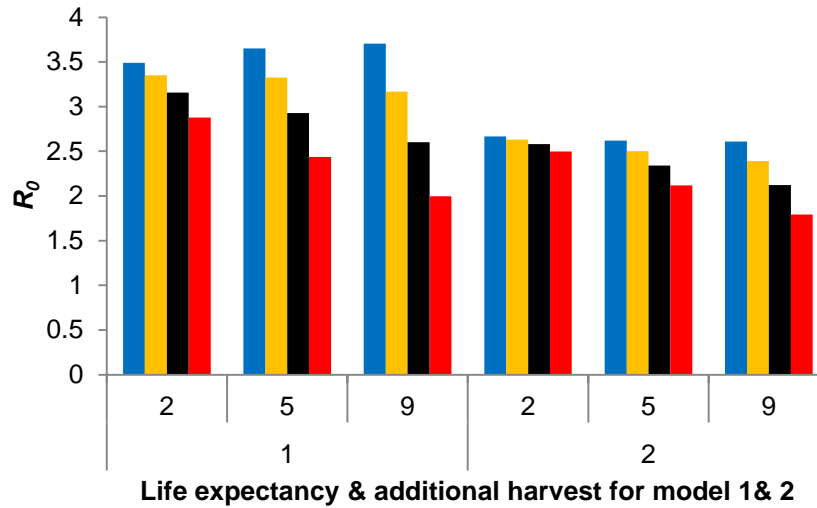

**S4 Figure. Mean basic reproductive number ( $R_0$ ) estimates.**

Mean  $R_0$  estimates from 10,000 simulations of Newcastle disease transmissions for homogenous (model 1) and age-structure (model 2) populations of white-winged parakeets with no additional harvest ( $hI=0$  blue) and three additional uncompensated harvest rates ( $hI=2\%$  orange,  $hI=5\%$  black, and  $hI=10\%$  red) and for three life expectancies ( $D_d$  = two, five, and nine years).
